# Supplementary material
Source: PubMed Central journal article supplement (PMC3237114)
Supplement: NIHMS339099-supplement-1.pdf [file NIHMS339099-supplement-1.pdf]

**Supplemental table 1 . List of common ZBRK1-mediated gene profiling.** The global profiling was performed by Agilent human whole genome oligo 4X 44K array. Among over five hundred genes, fold>1.5; p< 0.05 was considered significant, responded to the stably expressing ZBRK1 in HeLa or U2OS cells, the common candidates, 36 downregulated genes and 23 upregulated genes, were further analyzed by using a feature extraction software (Agilent) for the identification of potential cellular function.

| Gene symbol | Genes name                                         | fold  |         | Gene symbol | Genes name                                             | fold  |       |
|-------------|----------------------------------------------------|-------|---------|-------------|--------------------------------------------------------|-------|-------|
|             |                                                    | HeLa  | U2OS    |             |                                                        | HeLa  | U2OS  |
| A2BP1       | ataxin 2-binding protein 1                         | -2.57 | -1.61   | SNAP25      | synaptosomal-associated protein, 25kDa                 | -2.73 | -2.50 |
| AF131762    | Homo sapiens clone 25218 mRNA sequence             | -1.82 | -1.92   | STEAP1      | Six transmembrane epithelial antigen of the prostate 1 | -2.19 | -1.66 |
| AK001903    | Homo sapiens cDNA FLJ11041 fis                     | -2.16 | -1.72   | TAF15       | TATA box binding protein (TBP)-associated factor       | -1.55 | -1.61 |
| BG686022    | Homo sapiens cDNA clone                            | -3.41 | -1.52   | TCOF1       | Treacher Collins-Franceschetti syndrome 1              | -1.59 | -1.59 |
| C11orf46    | chromosome 11 open reading frame 46                | -1.61 | -1.59   | TNPO1       | transportin 1                                          | -1.88 | -1.54 |
| CEBPE       | CCAAT/enhancer binding protein, epsilon            | -1.52 | -1.79   | XBP1        | X-box binding protein 1                                | -1.89 | -2.11 |
| CHMP4B      | chromatin modifying protein 4B                     | -3.28 | -1.84   | AMDHD2      | amidohydrolase domain containing 2                     | 1.51  | 1.54  |
| CHST2       | carbohydrate sulfotransferase 2                    | -1.7  | -2.17   | ANK1        | ankyrin 1                                              | 2.19  | 4.77  |
| DLG4        | discs, large homolog 4                             | -1.77 | -1.85   | BTBD14A     | BTB (POZ) domain containing 14A                        | 1.9   | 1.87  |
| EGR1        | early growth response 1                            | -1.65 | -2.22   | C9orf5      | chromosome 9 open reading frame 5                      | 1.51  | 1.74  |
| ERO1L       | ERO1-like                                          | -1.52 | -1.52   | C9orf86     | chromosome 9 open reading frame 86                     | 1.88  | 1.57  |
| HMGA2       | high mobility group AT-hook 2                      | -1.54 | -2.50   | CAP2        | adenylate cyclase-associated protein, 2                | 1.56  | 1.63  |
| KCNAB2      | potassium voltage-gated channel, beta member 2     | -4.03 | -253.64 | CDH7        | cadherin 7                                             | 1.57  | 1.64  |
| LOC399956   | similar to Keratin                                 | -1.85 | -1.69   | CFL2        | cofilin 2                                              | 1.82  | 1.52  |
| METTL3      | methyltransferase like 3                           | -1.62 | -1.54   | CRYAB       | crystallin, alpha B                                    | 2.06  | 2.33  |
| MMP9        | matrix metalloproteinase 9                         | -1.82 | -2.06   | CTSA        | cathepsin A                                            | 1.52  | 1.56  |
| MTAP        | methylthioadenosine phosphorylase                  | -1.54 | -1.61   | DLGAP4      | discs, large homolog-associated protein 4              | 1.51  | 2.09  |
| NFE2L1      | nuclear factor (erythroid-derived 2)-like 1        | -1.65 | -1.73   | DQX1        | DEAQ box RNA-dependent ATPase 1                        | 1.51  | 1.62  |
| NMT1        | N-myristoyltransferase 1                           | -1.7  | -1.61   | HSPB2       | heat shock protein 2                                   | 1.56  | 3.76  |
| ODC1        | ornithine decarboxylase 1                          | -1.51 | -1.52   | IKZF2       | IKAROS family zinc finger 2                            | 5.17  | 2.16  |
| PAQR3       | progesterin and adipoQ receptor family member III  | -1.86 | -1.61   | LOC554175   |                                                        | 1.56  | 1.66  |
| PLCB2       | phospholipase C, beta 2                            | -1.5  | -1.69   | LY6K        | lymphocyte antigen 6 complex, locus K                  | 2.32  | 1.77  |
| PLOD2       | procollagen-lysine, 2-oxoglutarate 5-dioxygenase 2 | -1.77 | -2.00   | MXD4        | MAX dimerization protein 4                             | 1.54  | 1.81  |
| PPM1F       | protein phosphatase 1F                             | -1.68 | -1.67   | MYBL1       | v-myb myeloblastosis viral oncogene homolog like 1     | 1.52  | 1.67  |
| RAB38       | RAB38                                              | -4.08 | -2.17   | NCAM1       | neural cell adhesion molecule 1                        | 1.57  | 1.71  |
| RORA        | RAR-related orphan receptor A                      | -2.16 | -1.67   | SH3GLB2     | SH3-domain GRB2-like endophilin B2                     | 1.5   | 1.63  |
| RPA4        | replication protein A4                             | -1.71 | -2.38   | VIM         | vimentin                                               | 1.85  | 1.52  |
| SCARNA17    | small Cajal body-specific RNA 17                   | -2.08 | -1.72   | ZNF364      | ring finger protein 115                                | 1.69  | 1.55  |
| SEPP1       | selenoprotein P, plasma, 1                         | -13.7 | -4.00   | ZNF467      | zinc finger protein 467                                | 1.64  | 1.60  |
| SLC20A1     | solute carrier family 20, member 1                 | -1.81 | -1.62   |             |                                                        |       |       |

**Supplemental table 2. List of common ZBRK1-mediated functional profiling.** 36 downregulated genes and 23 upregulated genes responded to the increase of ZBRK1 were uploaded into Ingenuity's software [Ingenuity Pathway Analysis (IPA); <http://www.injenuity.com>] and divided into groups according to their known biological function.

| Category                               | Genes                                                                                                      |
|----------------------------------------|------------------------------------------------------------------------------------------------------------|
| Cellular Movement                      | CEBPE, CHST2, ICAM1, MMP9, NCAM1, ODC1, PLCB2, SH3GLB2, VIM                                                |
| Cellular Growth and Proliferation      | EGR1, HMGA2, HSPB2, METTL3, MTAP, MYBL1, NCAM1, SH3GLB2, TCOF1                                             |
| Cell Morphology                        | ANK1, CAP2, CEBPE, DLG4, EGR1, HSPB2, IKZF2, MMP9, NCAM1, ODC1, PPM1F, SLC20A1, TAF15, VIM1, XBP1          |
| Cell Death                             | CRYAB, HMGA2, NFE2L1, XBP1                                                                                 |
| Cell Cycle                             | CRYAB, EGR1, MMP9, MYBL1, MXD4, VIM, XBP1                                                                  |
| Gene Expression                        | CEBPE, EGR1, HMGA2, NCAM1, NFE2L1, RORA, SLC20A1, TAF15, TCOF1, XBP1, ZNF467                               |
| Cellular Development                   | ANK1, CEBPE, CRYAB, EGR1, HMGA2, MMP9, MYBL1, NCAM1, NMT1, ODC1, PAQR3, RORA, XBP1                         |
| Cellular Function and Maintenance      | CEBPE, EGR1, ERO1L, HSPB2, NCAM1, SNAP25, VIM, XBP1                                                        |
| Cancer                                 | CEBPE, EGR1, HMGA2, HSPB2, IKZF2, MMP9, MTAP, MYBL1, NCAM1, NFE2L1, ODC1, PAQR3, PPM1F, SH3GLB2, VIM, XBP1 |
| Carbohydrate Metabolism                | CHST2, SEPP1                                                                                               |
| Cell-To-Cell Signaling and Interaction | CEBPE, DLG4, EGR1, HSPB2, KCNAB2, MMP9, NCAM1, VIM,                                                        |
| Cellular Assembly and Organization     | ANK1, CFL2, CRYAB, DLG4, HMGA2, NCAM1, SNAP25, XBP1, VIM                                                   |
| Connective Tissue Disorders            | EGR1, MMP9, PLOD2, SLC20A1, TAF15                                                                          |
| Lipid Metabolism                       | SEPP1                                                                                                      |
