# Supplementary material
Source: PubMed Central journal article supplement (PMC3237114)
Supplement: NIHMS339099-supplement-6.pdf [file NIHMS339099-supplement-6.pdf]

Lin, Li Fang

Supplemental figure 4

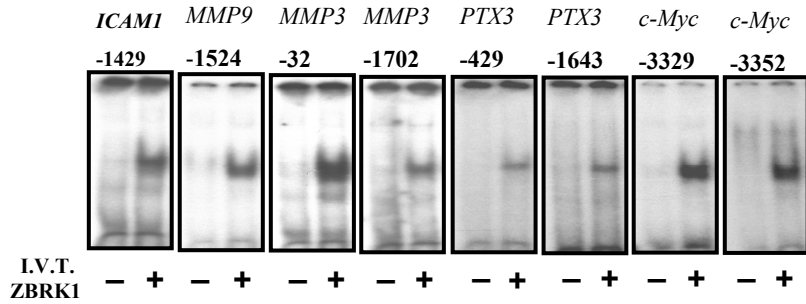

ICAM1-Oligo 1429: 5'- GAACCCGTGGCGCAGGATTTTCCCAGG-3',  
MMP9-Oligo 1524: 5'- GAACCCGGGAGGCAGATGTTGCAGTGA -3',  
MMP3-Oligo 32: 5'-ACTCTTTAAAAGCTGCGCTCCCGAGGT-3',  
MMP3-Oligo 1702: 5'-GAATTCACATCACTGCCACCACTCTGT -3',  
PTX3-Oligo 429: 5'-TTATCTTGGAATCAGACCATTTTCAGT- 3',  
PTX3-Oligo 1643: 5'-CTTTTAGAGCTTCAGTAGTTTTAAACA- 3',  
Myc-Oligo 3329: 5'- GCGGTGGGCGCGCAGTGCGTTCTCTGT-3',  
Myc-Oligo 3352: 5'-CTGTGTGGCGGGCAGCTGTTCCGCCTG-3''.
