# Supplementary material
Source: PubMed Central journal article supplement (PMC3237114)

Supplemental figure 1

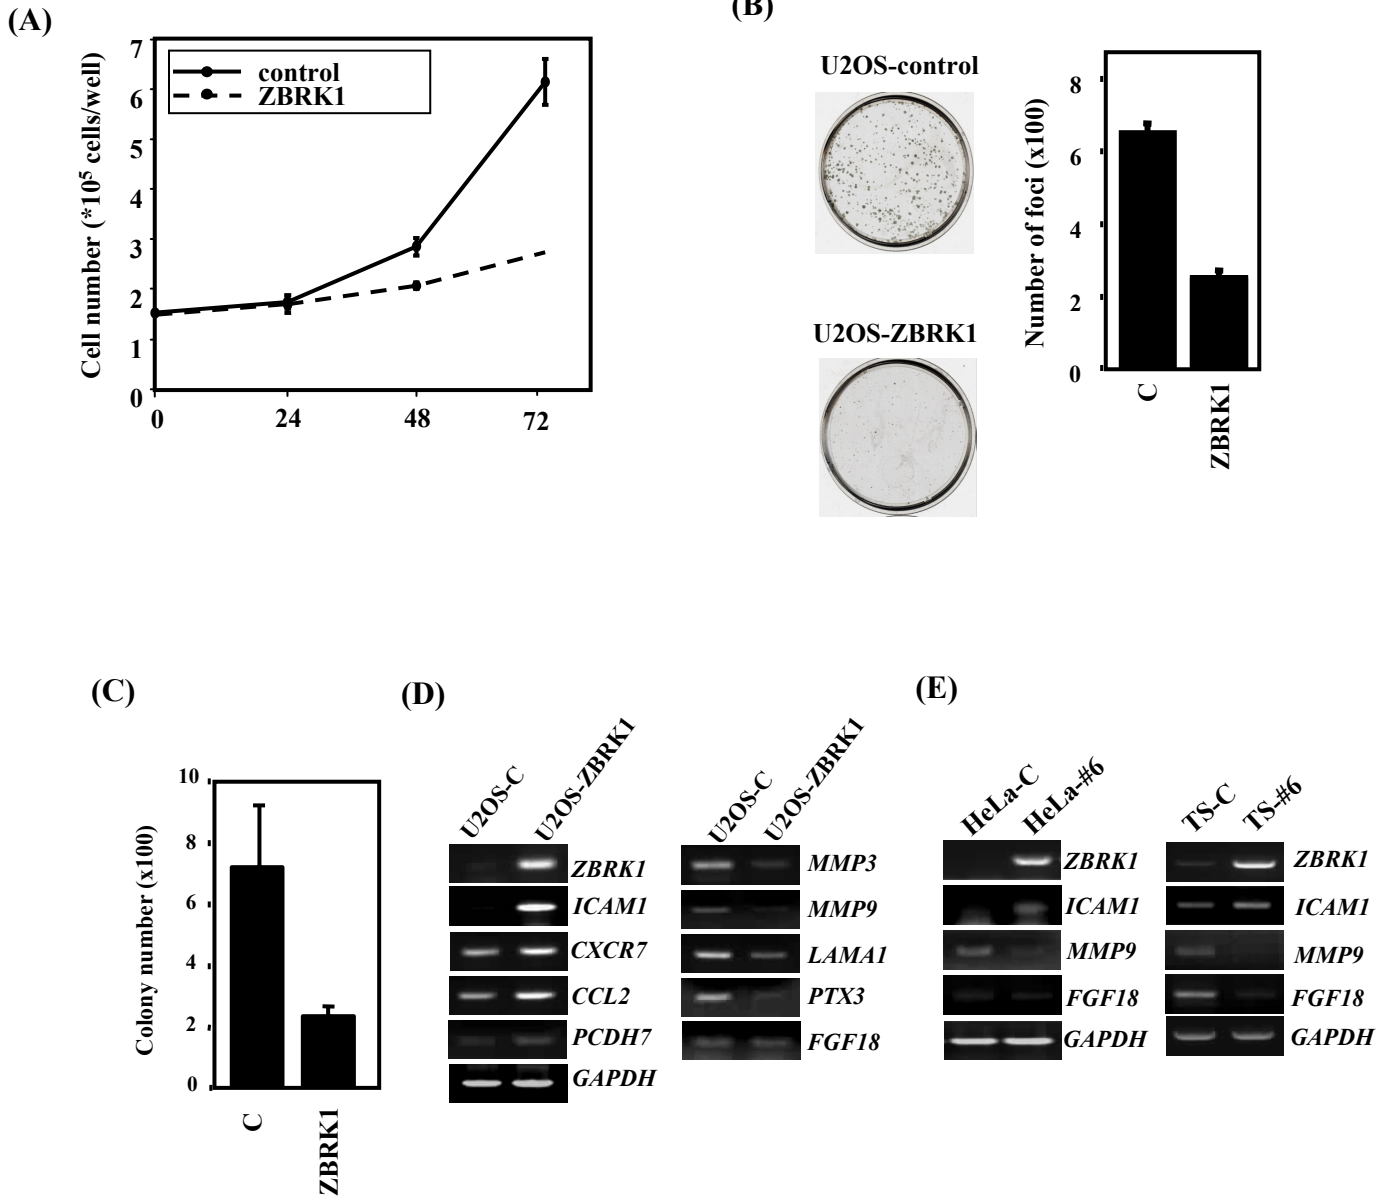

Supplement: NIHMS339099-supplement-3.pdf [file NIHMS339099-supplement-3.pdf]

Lin, Li Fang

Supplemental figure 2

(A) Microarray of U2OS cells

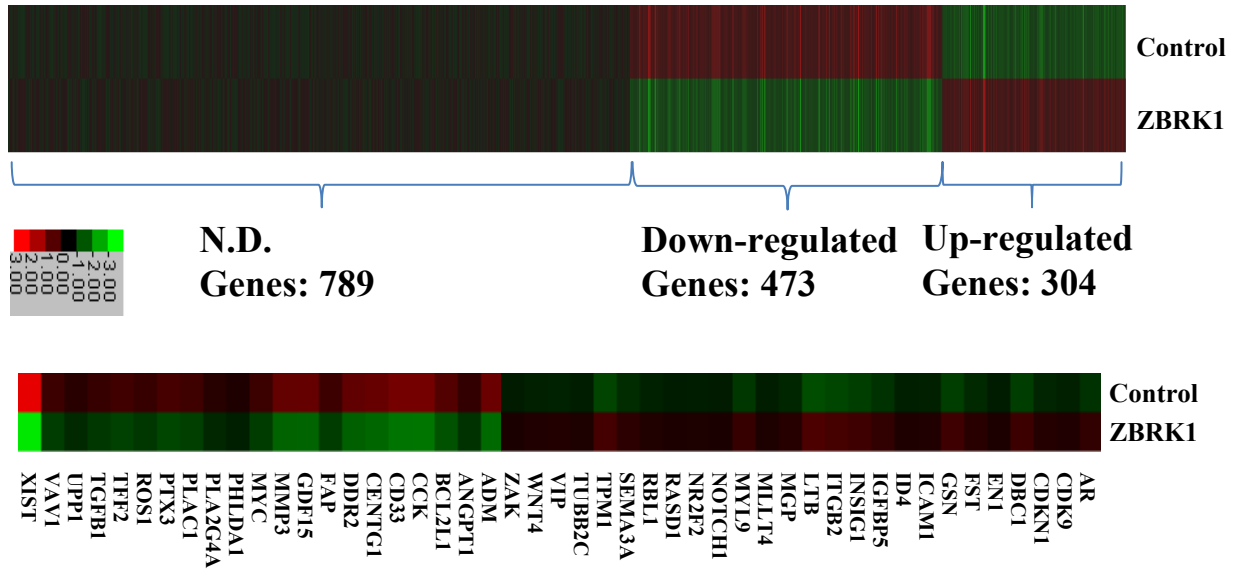

(B) Microarray of HeLa cells

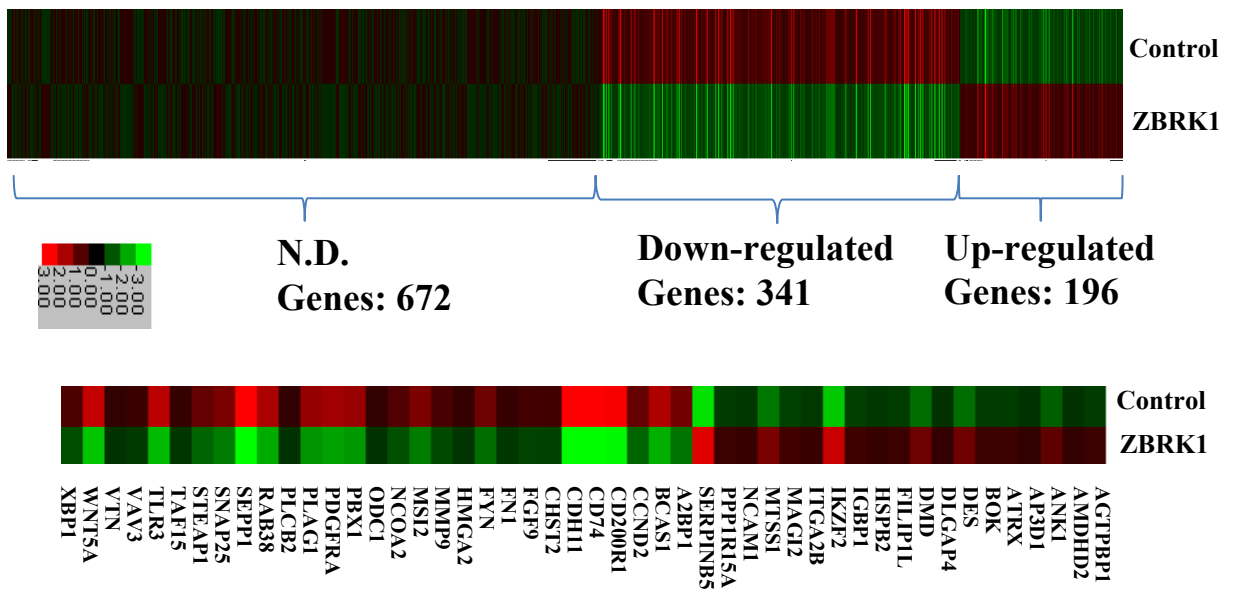

Supplement: NIHMS339099-supplement-4.pdf [file NIHMS339099-supplement-4.pdf]

Lin, Li Fang

Supplemental figure 3

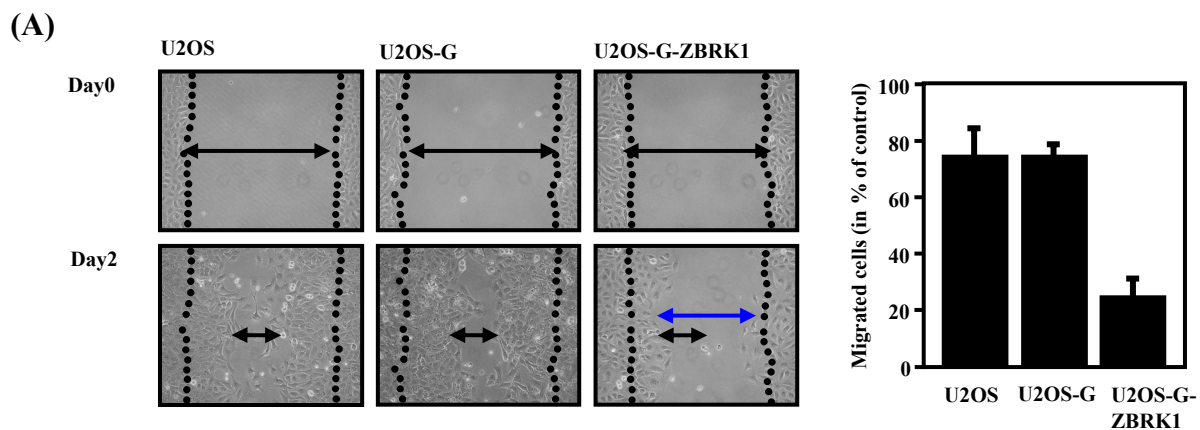

(B)

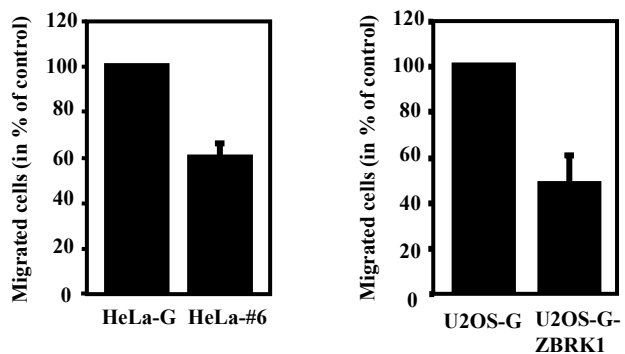

(C)

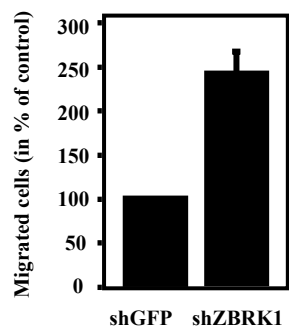

(D)

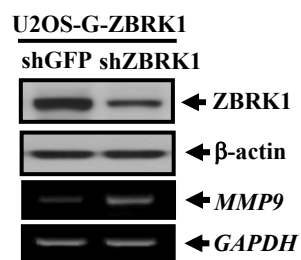

Supplement: NIHMS339099-supplement-5.pdf [file NIHMS339099-supplement-5.pdf]
